# Supplementary material for: Conserved Expression Patterns Predict microRNA Targets
Source: PLoS Comput Biol. 2009 Sep 25;5(9):e1000513. doi: 10.1371/journal.pcbi.1000513 (PMC2736581; doi:10.1371/journal.pcbi.1000513)
Supplement: Table S4 — High scoring CNC pairs. (0.12 MB XLS) [file pcbi.1000513.s006.xls]

## Sheet: Sheet1
High scoring CNC pairs
target gene	microRNA
ACTR2	hsa-let-7c
ABCA1	hsa-miR-183
ABCB9	hsa-let-7d
ABCD1	hsa-miR-9
ADCY6	hsa-miR-19b
ADCY6	hsa-miR-19a
ADD3	hsa-miR-96
AMFR	hsa-miR-96
APOD	hsa-miR-15b
ARID3B	hsa-let-7c
ATXN1	hsa-miR-15b
BACE1	hsa-miR-425
BATF	hsa-miR-99a
BCL6	hsa-miR-183
BICD2	hsa-miR-199a
C1QB	hsa-miR-15a
CIB2	hsa-miR-134
CLU	hsa-miR-19b
CNOT7	hsa-miR-218
CPD	hsa-miR-181a
CSE1L	hsa-miR-29c
CSF1	hsa-miR-19a
CTDSP1	hsa-miR-124
CTSO	hsa-miR-18a
DNAJB9	hsa-miR-93
EDEM1	hsa-miR-125b
EDEM1	hsa-miR-23b
EDEM1	hsa-miR-125a
EDEM1	hsa-miR-124
EDG2	hsa-miR-25
EIF2S3	hsa-miR-125b
ELF3	hsa-miR-9
EPS8	hsa-miR-181a
ESRRA	hsa-miR-214
EZH1	hsa-miR-34a
F3	hsa-miR-19a
FAM50A	hsa-miR-145
FAM8A1	hsa-let-7f
FBXW2	hsa-miR-125b
FHL1	hsa-miR-425
FLT1	hsa-miR-130b
FLT1	hsa-miR-20a
GFER	hsa-miR-143
GUCY1A3	hsa-miR-106b
HCLS1	hsa-miR-27b
HIPK1	hsa-miR-28
HLA-DOA	hsa-miR-134
HLF	hsa-miR-19a
HLF	hsa-miR-21
HLF	hsa-miR-20a
HMGCL	hsa-miR-744
HSD17B4	hsa-miR-196a
HSPA1B	hsa-miR-144
HSPA8	hsa-miR-144
IDE	hsa-miR-93
IGF1	hsa-miR-19a
IGF1	hsa-miR-186
IKBKG	hsa-miR-34a
ILVBL	hsa-miR-708
IQGAP1	hsa-miR-124
IRF2	hsa-miR-93
IRF4	hsa-miR-124
ITGB7	hsa-let-7c
KIAA0415	hsa-miR-145
KIAA0415	hsa-miR-199a
LCP1	hsa-miR-93
LRRFIP1	hsa-miR-124
LRRFIP1	hsa-let-7e
LRRFIP1	hsa-let-7c
LRRFIP1	hsa-miR-9
LYPLA2	hsa-miR-27b
MAPK14	hsa-miR-124
MCL1	hsa-miR-125a
MECP2	hsa-miR-99a
MET	hsa-miR-106b
MLYCD	hsa-miR-19b
MYH9	hsa-miR-124
NCALD	hsa-miR-19b
NCALD	hsa-miR-19a
NDRG1	hsa-miR-20a
NFATC1	hsa-miR-99a
NFIB	hsa-miR-32
NFIB	hsa-miR-186
NFYC	hsa-miR-122
NMT1	hsa-miR-125b
NR3C1	hsa-miR-377
OLFM1	hsa-miR-19b
PAFAH1B1	hsa-miR-96
PAFAH1B1	hsa-miR-25
PAFAH1B1	hsa-miR-32
PAFAH1B1	hsa-miR-106b
PARP3	hsa-miR-134
PIK3R1	hsa-miR-182
PLCL2	hsa-miR-130a
PLD2	hsa-miR-214
PLEK	hsa-miR-196a
PLLP	hsa-miR-21
PPM1B	hsa-miR-32
PPP1R3C	hsa-miR-19b
PPP1R3C	hsa-miR-19a
PPP2CA	hsa-miR-125b
PRSS23	hsa-miR-19a
PSMC4	hsa-miR-125b
PTPN18	hsa-miR-9
PTPRE	hsa-miR-93
PTRF	hsa-miR-210
RAB11FIP2	hsa-miR-155
RAC1	hsa-miR-130a
RELA	hsa-miR-124
RGS10	hsa-miR-22
RGS10	hsa-miR-379
RNF141	hsa-miR-218
RPIA	hsa-miR-124
RPP21	hsa-miR-125b
SCAMP1	hsa-miR-19b
SCAMP2	hsa-miR-124
SEL1L	hsa-miR-181a
SEMA6A	hsa-let-7f
SEPT8	hsa-let-7g
SESN1	hsa-miR-183
SIGIRR	hsa-miR-125b
SLC25A4	hsa-let-7c
SLC35E1	hsa-miR-10a
SLC4A4	hsa-miR-15b
SLC4A4	hsa-miR-15a
SPARCL1	hsa-miR-130b
SRI	hsa-miR-20a
SSH3	hsa-miR-15a
TAPBPL	hsa-miR-9
TGFBRAP1	hsa-miR-136
TGFBRAP1	hsa-miR-379
TIA1	hsa-miR-23a
TIMM17B	hsa-miR-125b
TNC	hsa-miR-425
TOM1L2	hsa-miR-34a
TRIM2	hsa-miR-21
TRIM2	hsa-miR-19b
TSTA3	hsa-miR-125b
UBE2A	hsa-miR-20a
UBE2A	hsa-miR-130b
UBL3	hsa-miR-19b
UBN1	hsa-miR-381
USP33	hsa-miR-378
VAV3	hsa-miR-9
