# Supplementary material for: Conserved Expression Patterns Predict microRNA Targets
Source: PLoS Comput Biol. 2009 Sep 25;5(9):e1000513. doi: 10.1371/journal.pcbi.1000513 (PMC2736581; doi:10.1371/journal.pcbi.1000513)
Supplement: Table S5 — miRNA transfection experiments. (0.11 MB XLS) [file pcbi.1000513.s007.xls]

## Sheet: Sheet1
miRNA transfection experiments
GEO experiment ID	GSE8501	gse2075	GSE8501	GSE2075	GSE6838	GSE8501	gse2075	GSE7864	GSE10863	gse8501	Total
transfected miRNA (hsa-miR-)	122a	124	142	373	16	181a	1	34a	155	9
number of downregulated genes after transfection	128	174	47	65	84	42	86	79	51	53	809
number of upregulated genes after transfection	79	180	33	279	32	19	19	58	17	51	767
